# Supplementary figures and images for: Competition between lysogenic and sensitive bacteria is determined by the fitness costs of the different emerging phage-resistance strategies
Source: eLife journal article supplement (doi:10.7554/elife.83479), 2023-03-23

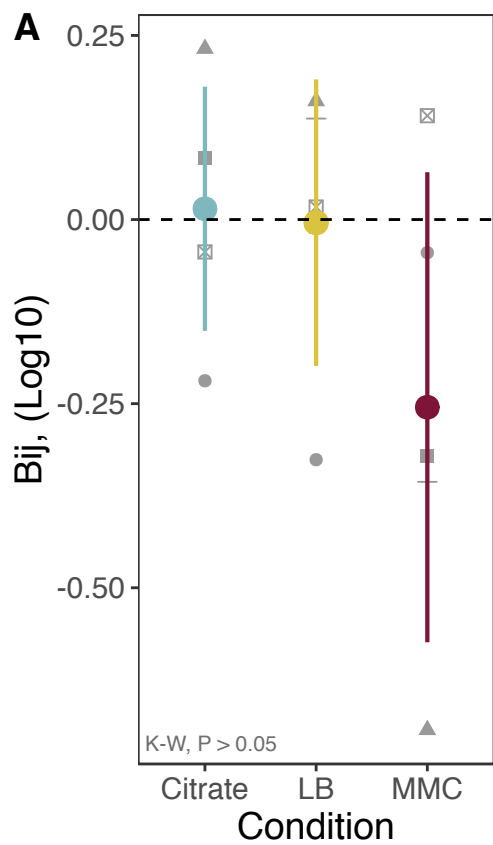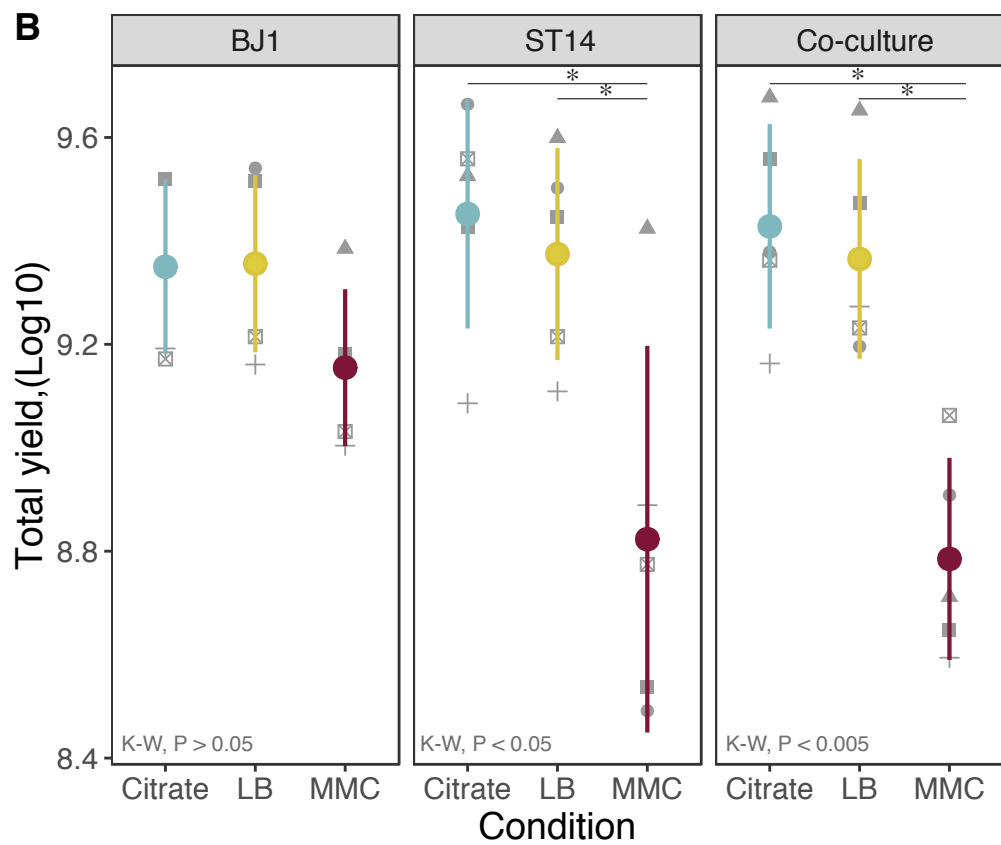

Supplement: supp [file elife-83479-supp-v1.zip]

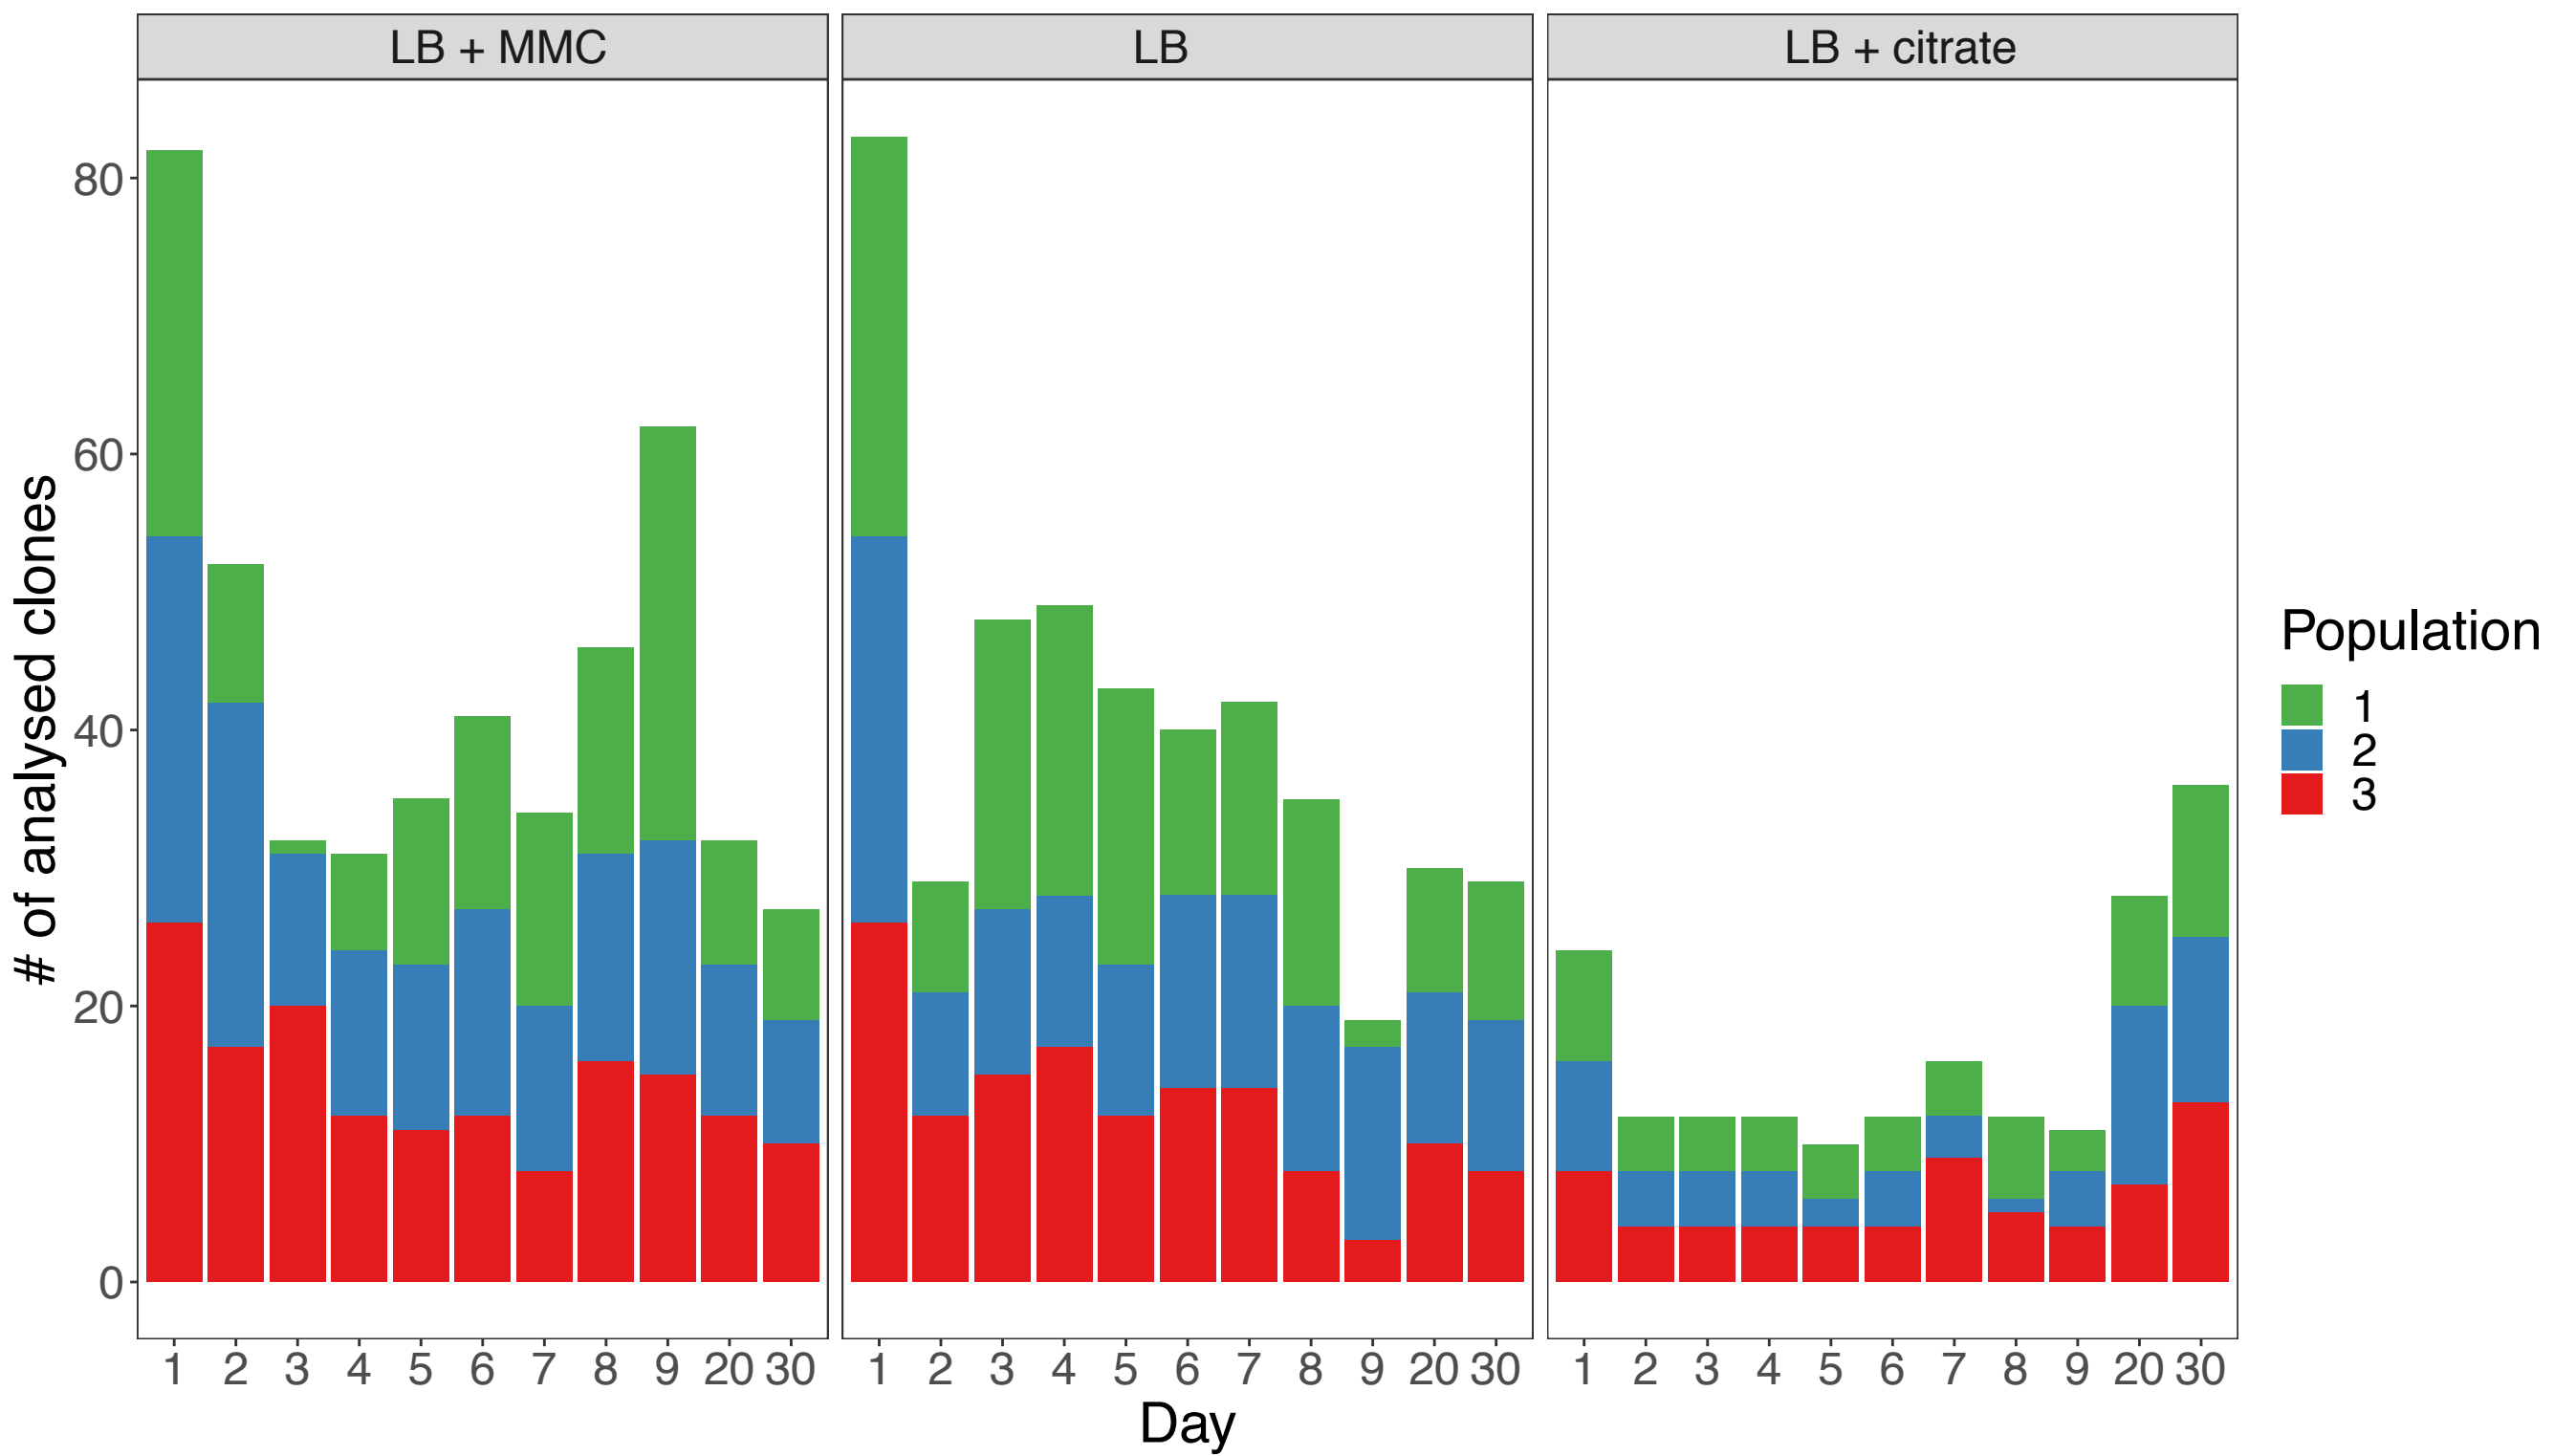

Supplement: supp [file elife-83479-supp-v1.zip]

**A**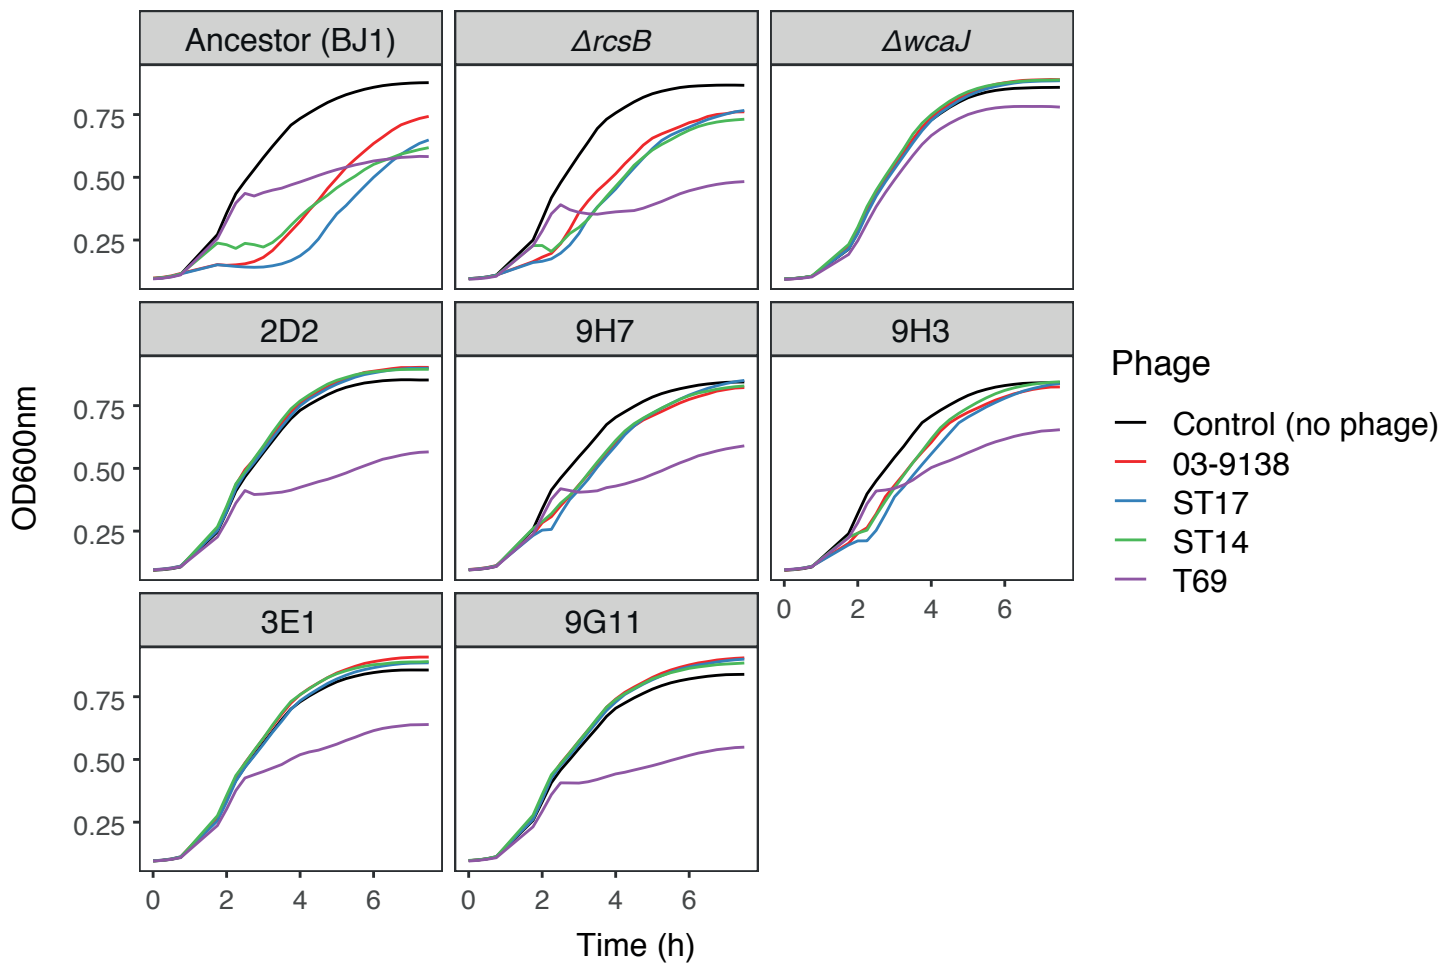**B**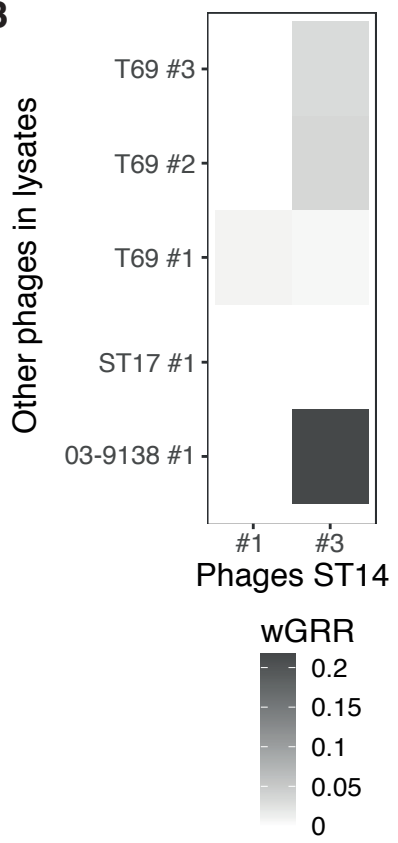**C**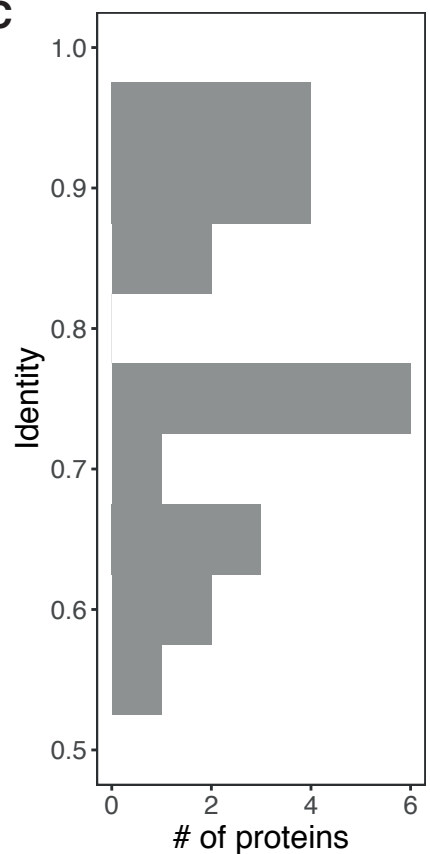**D**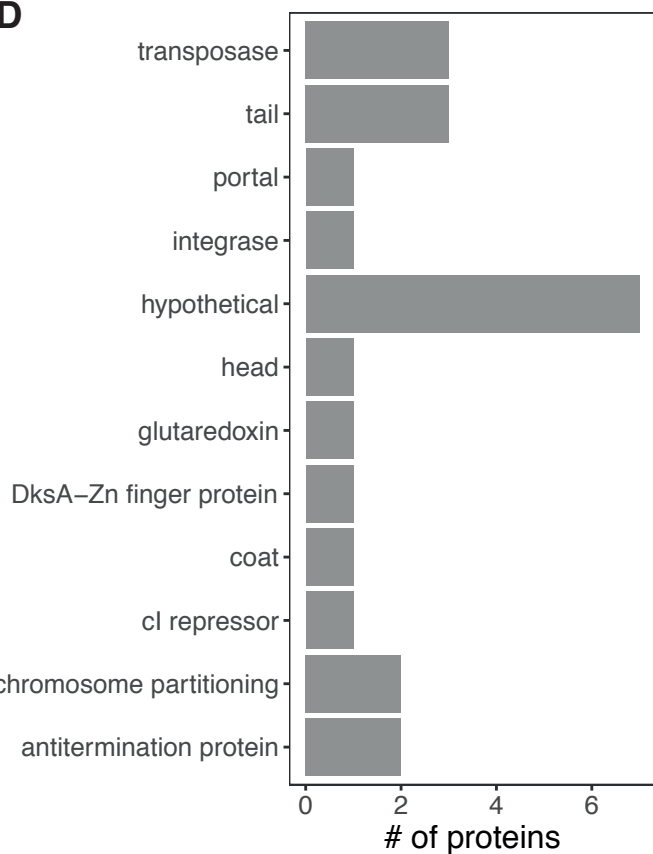

Supplement: supp [file elife-83479-supp-v1.zip]

OD<sub>600nm</sub>

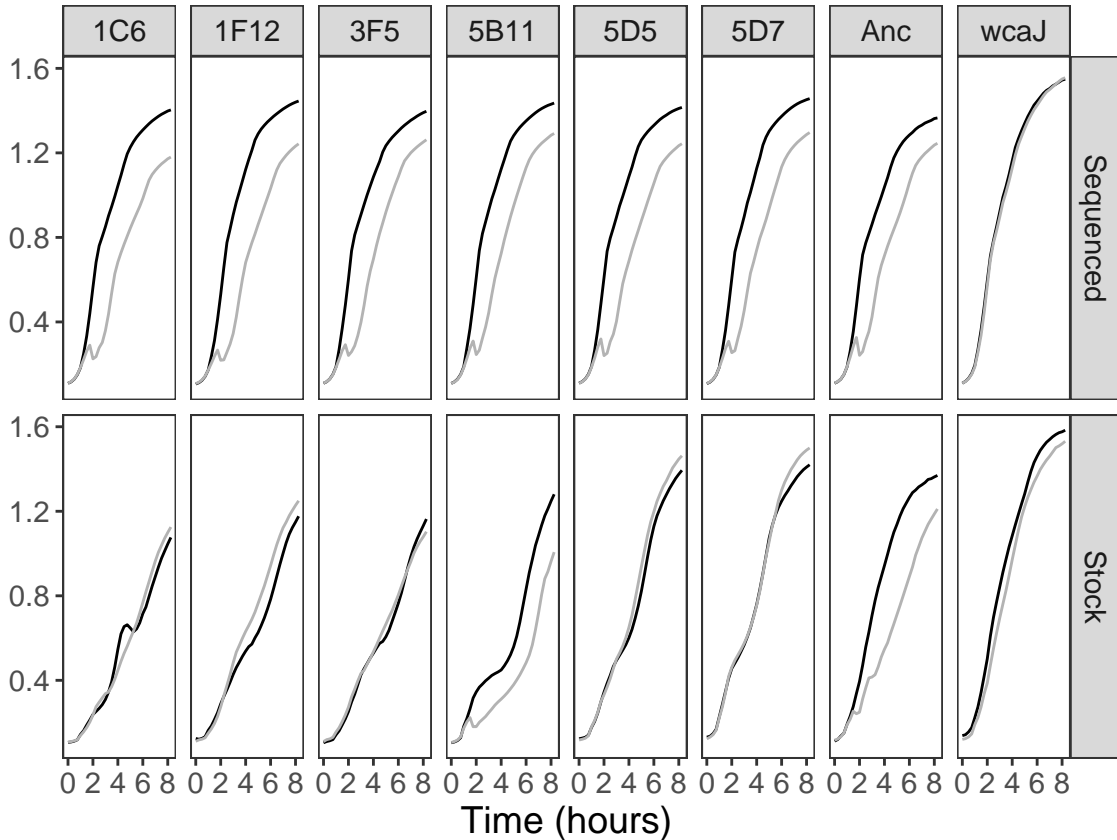

Condition

— LB

— Phage

Supplement: supp [file elife-83479-supp-v1.zip]

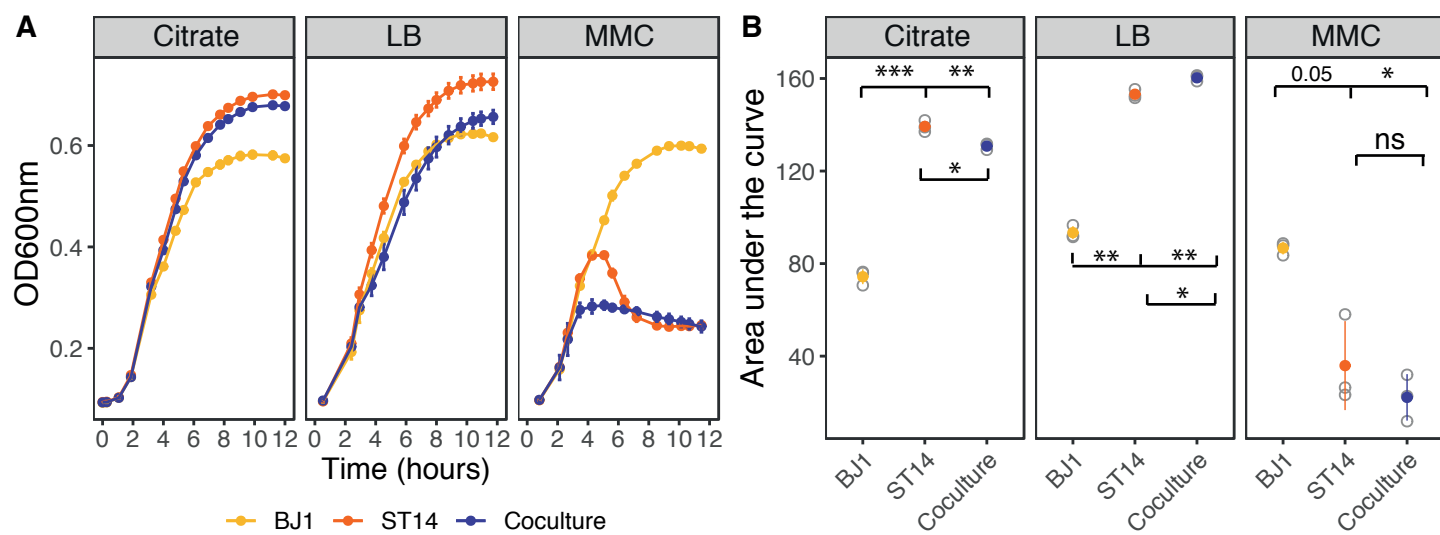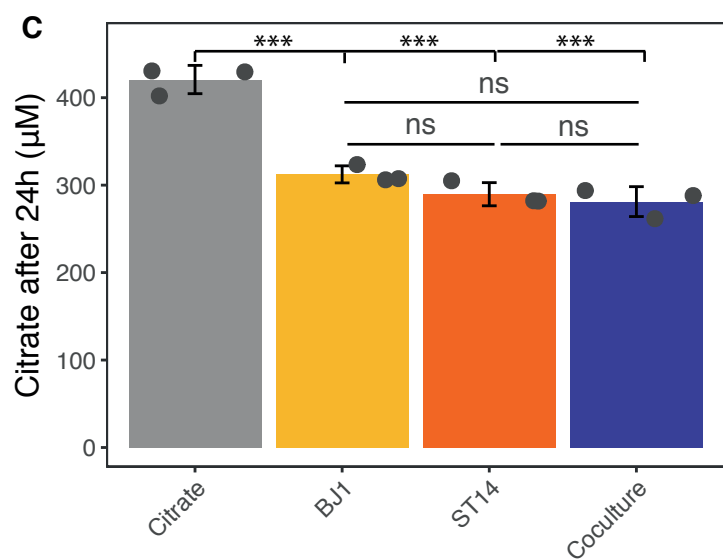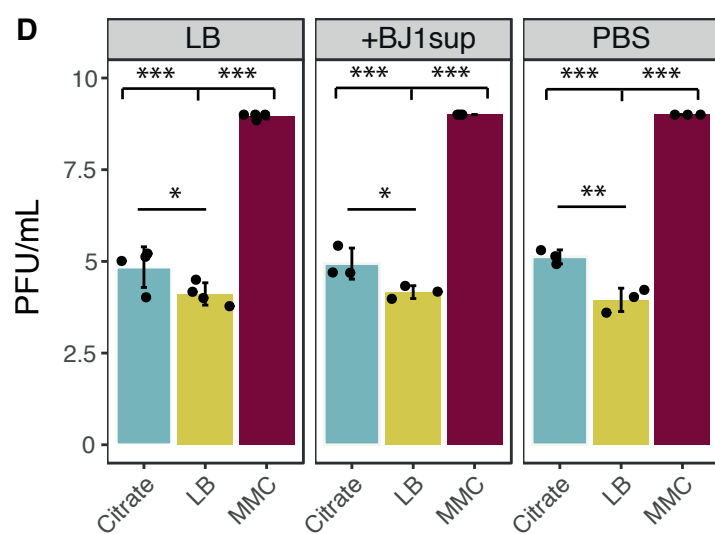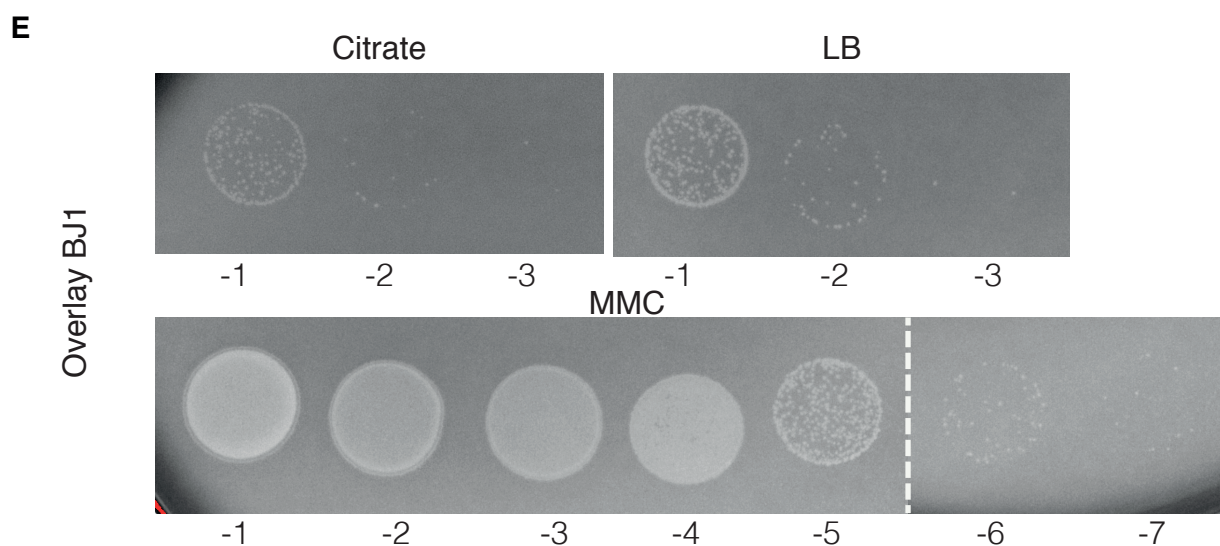

Supplement: supp [file elife-83479-supp-v1.zip]

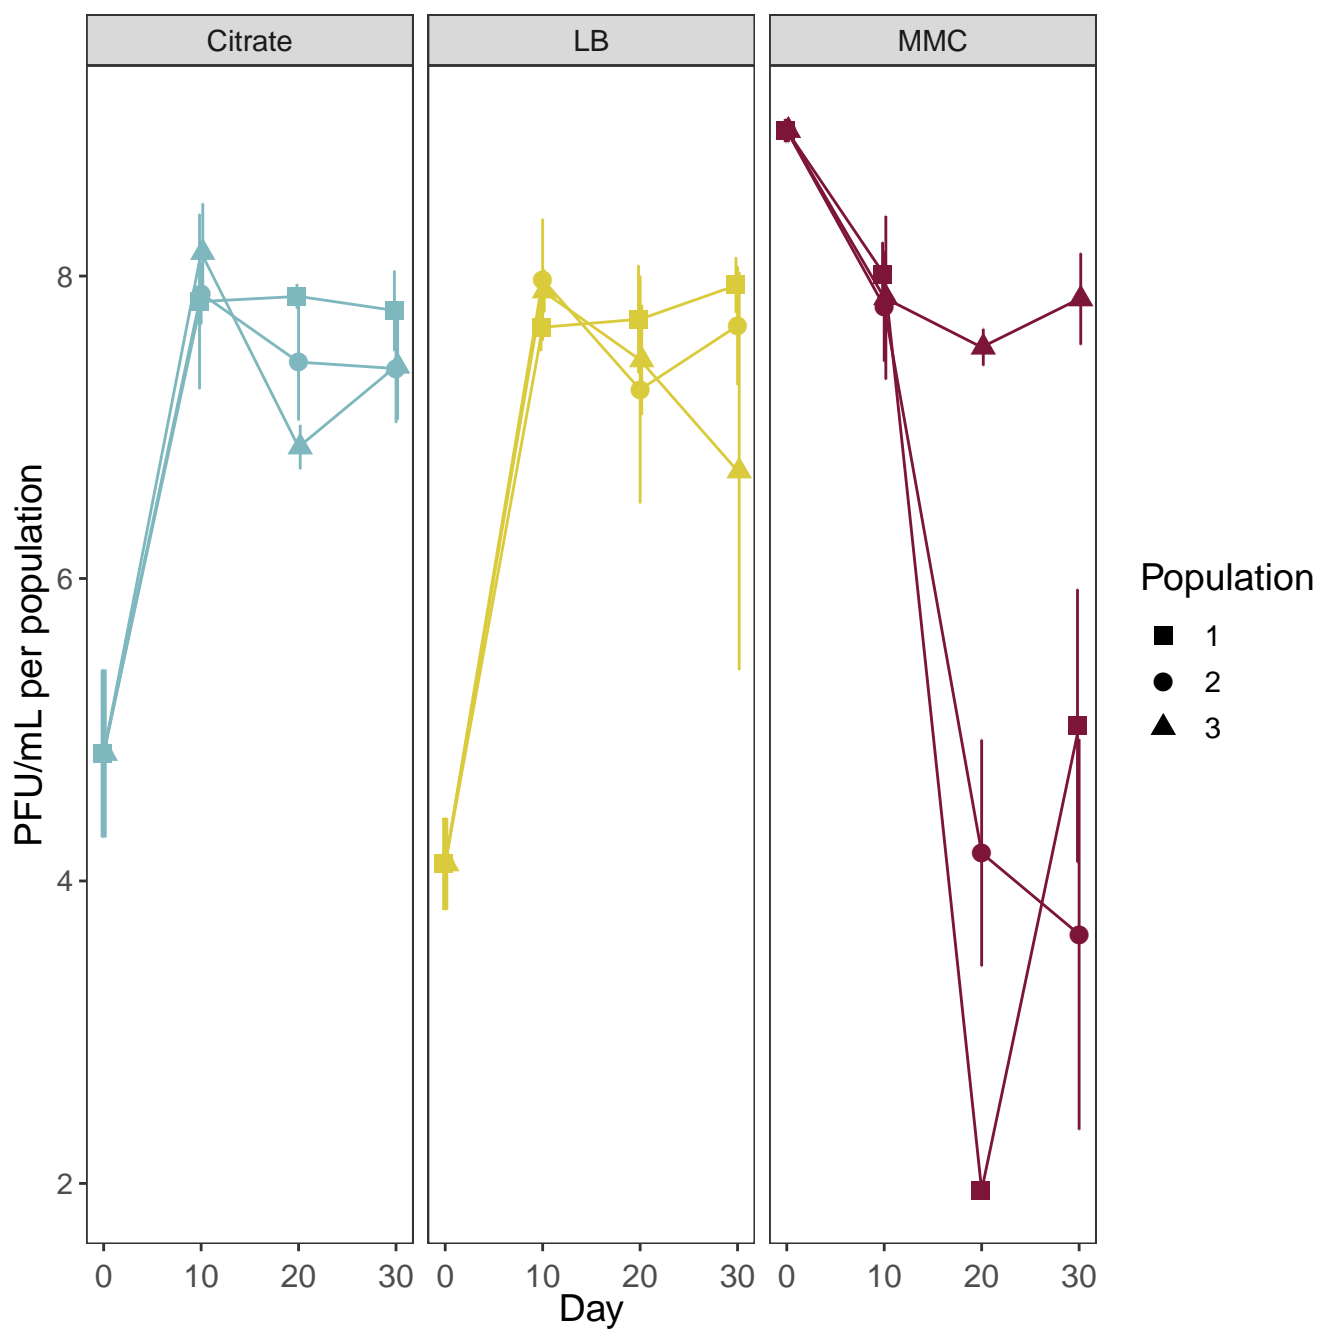

Supplement: supp [file elife-83479-supp-v1.zip]

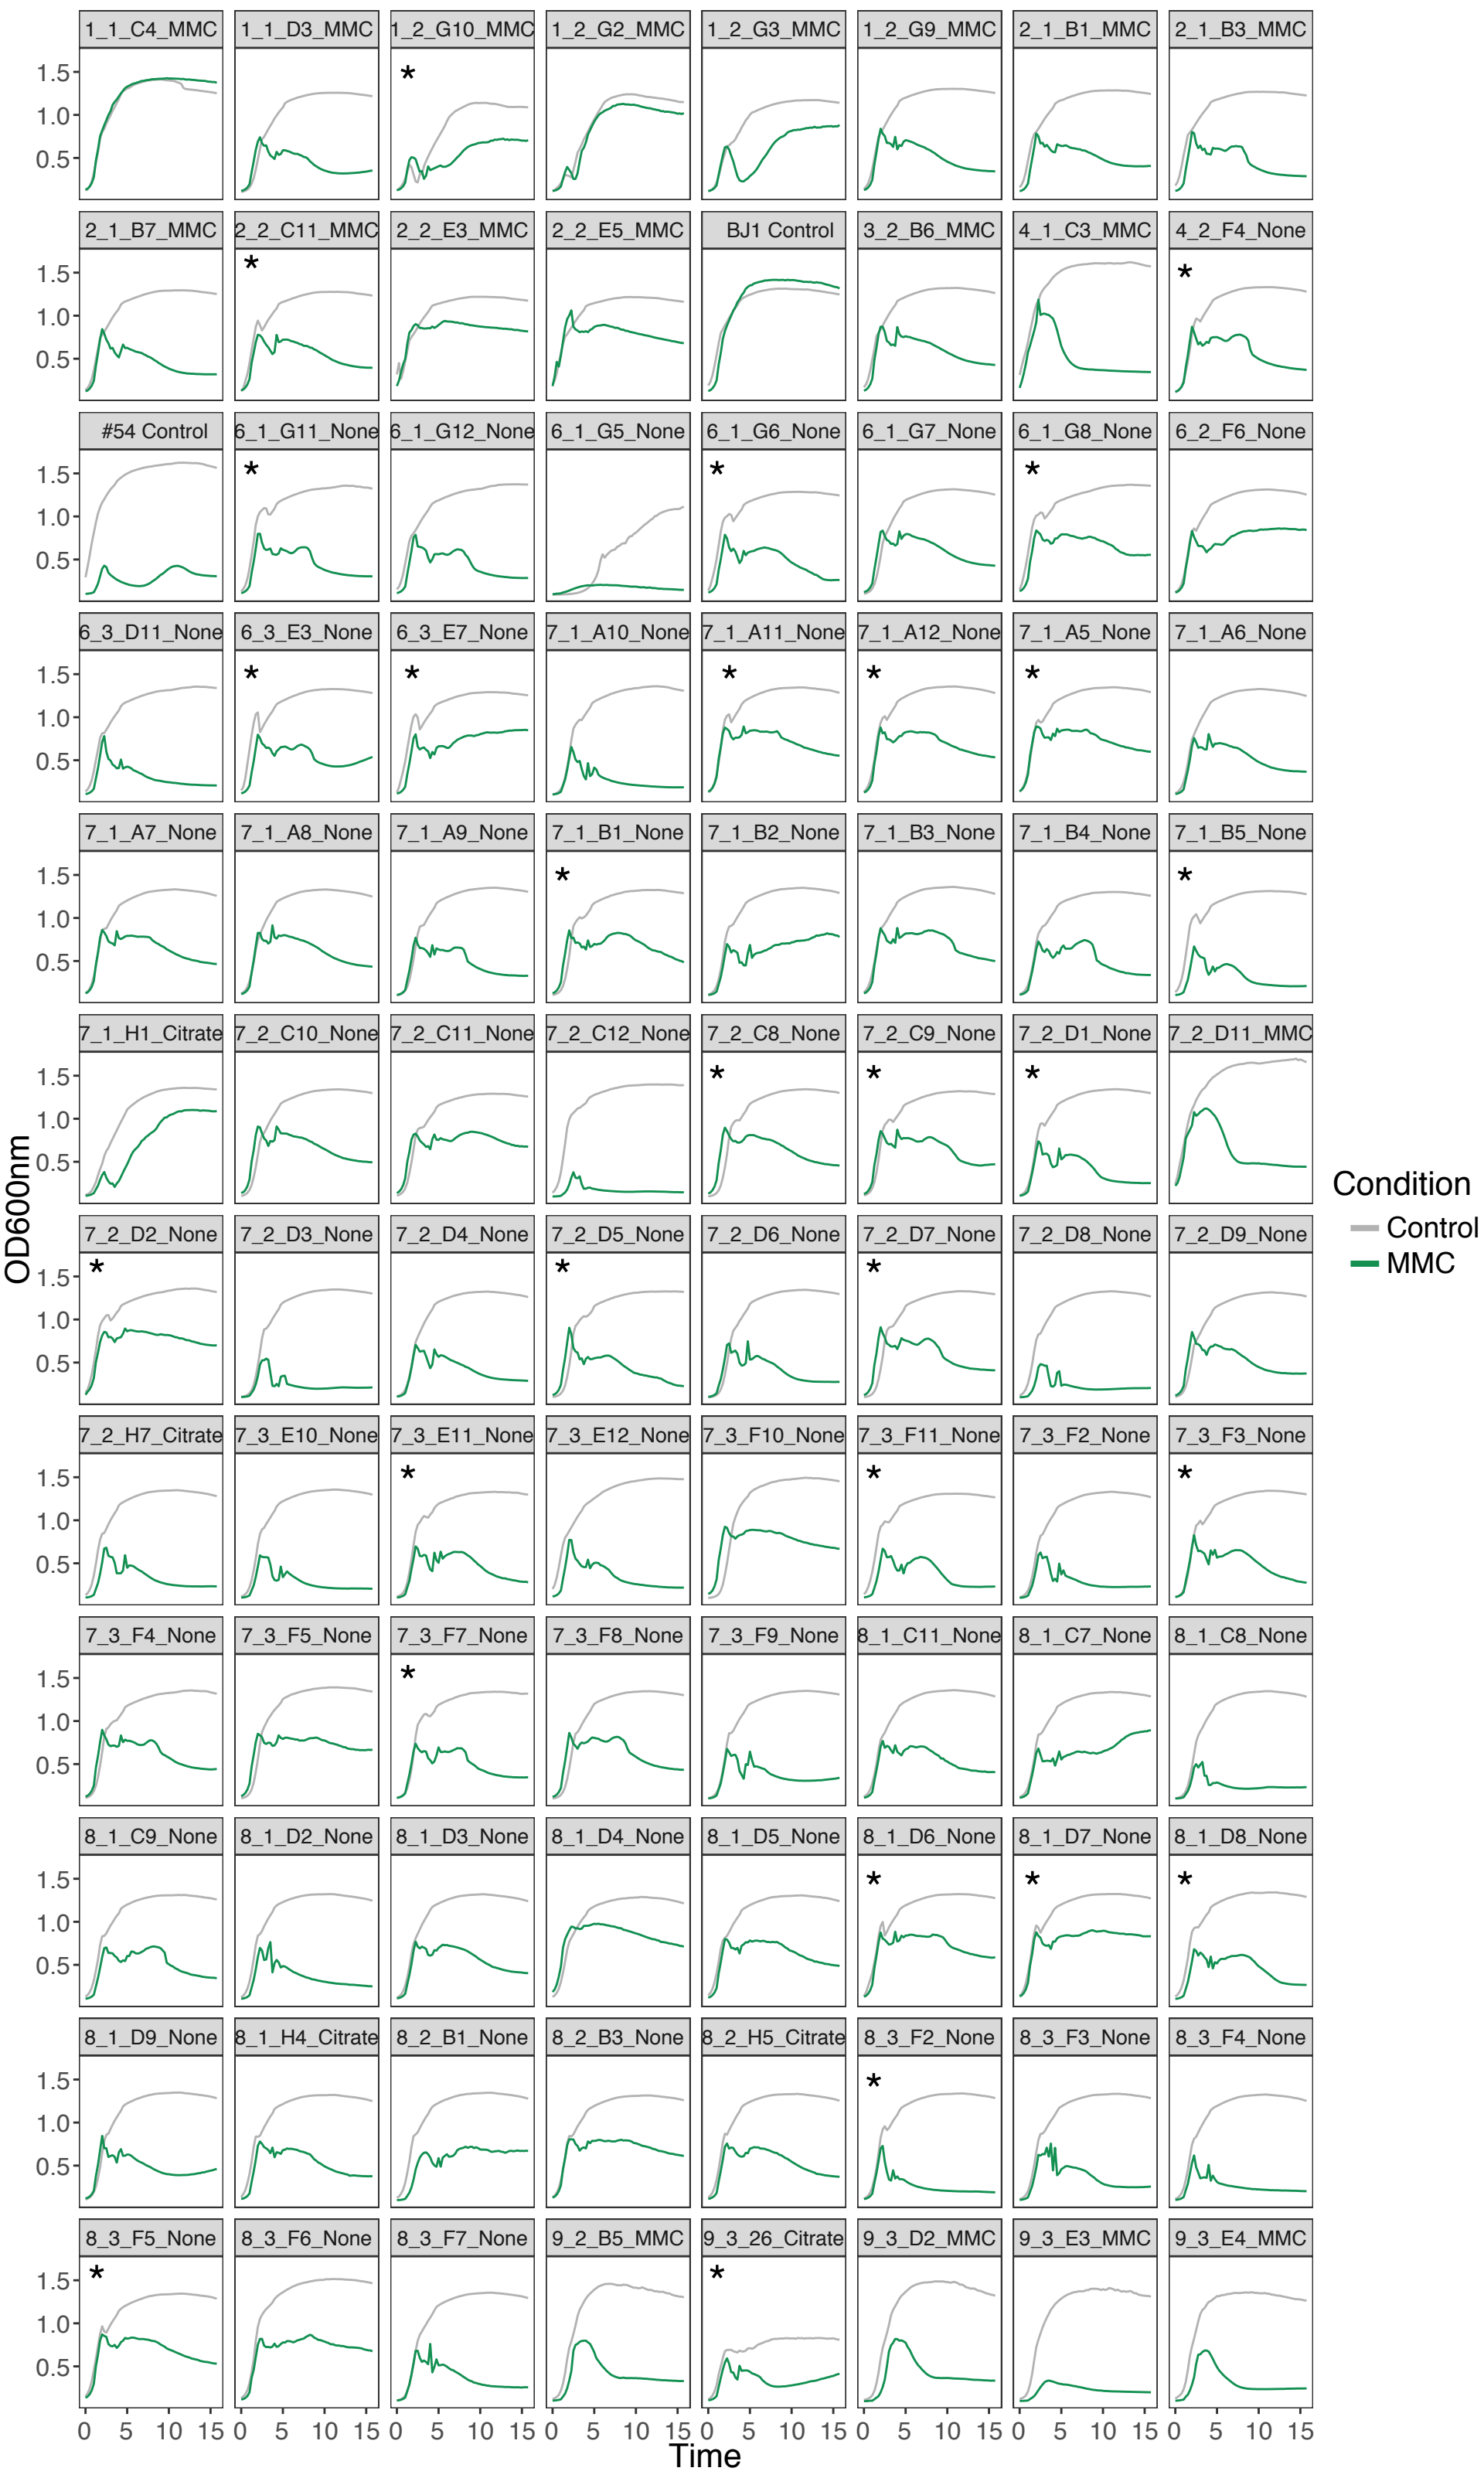

Supplement: supp [file elife-83479-supp-v1.zip]

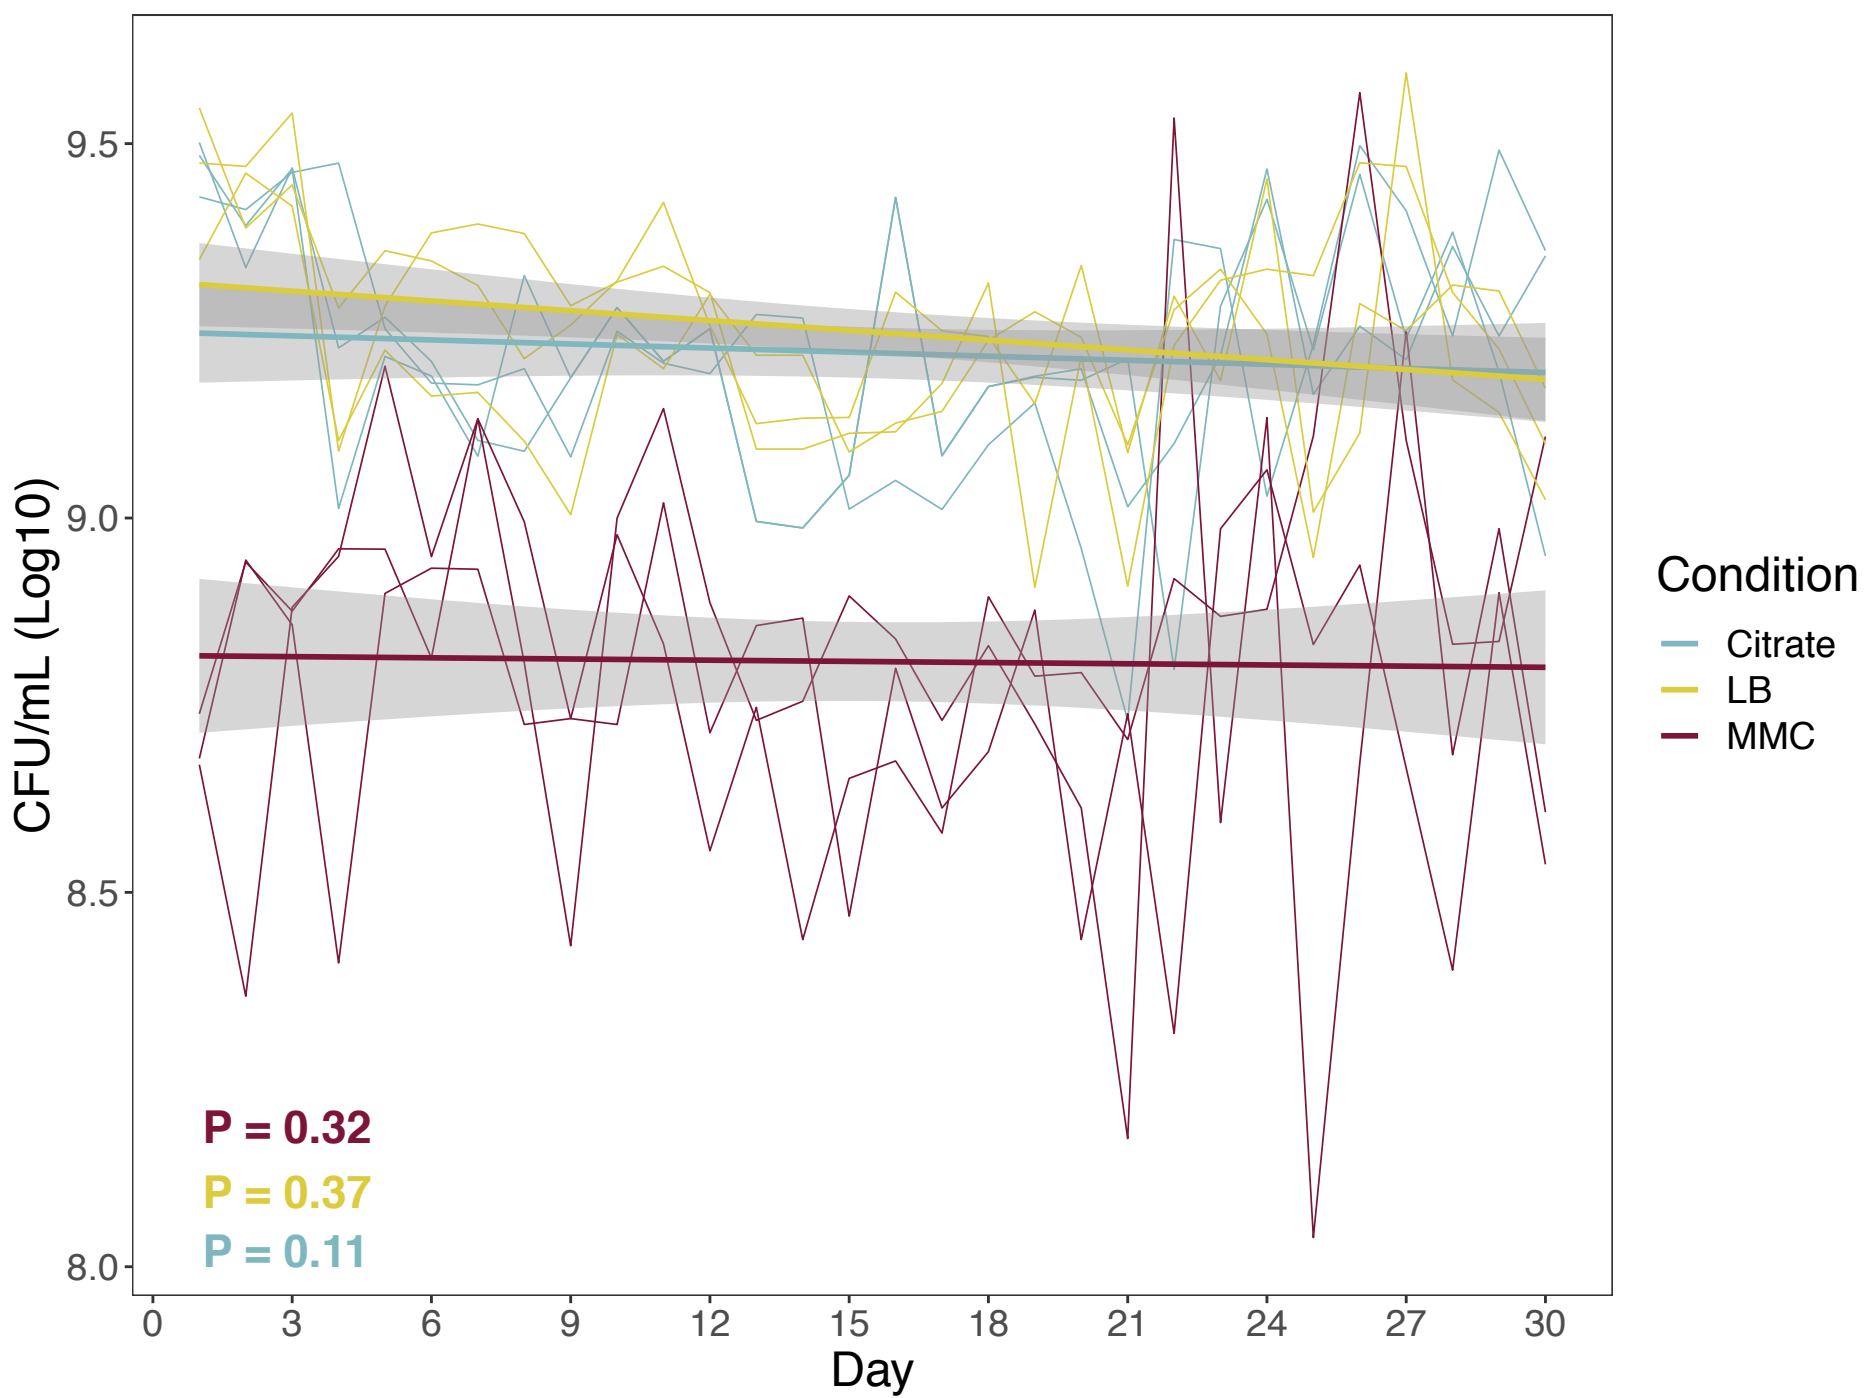

Supplement: supp [file elife-83479-supp-v1.zip]
